# Supplementary material for: SPOP mutation induces replication over-firing by impairing Geminin ubiquitination and triggers replication catastrophe upon ATR inhibition
Source: PubMed Central journal article supplement (PMC8486843; doi:10.1038/s41467-021-26049-6), 2021-10-01
Supplement: 41467_2021_26049_MOESM1_ESM.pdf [file 41467_2021_26049_MOESM1_ESM.pdf]

## **Supplementary Information**

SPOP mutation induces replication over-firing by impairing Geminin ubiquitination and triggers replication catastrophe upon ATR inhibition

Supplementary Figures 1-6

Supplementary Tables 1-4

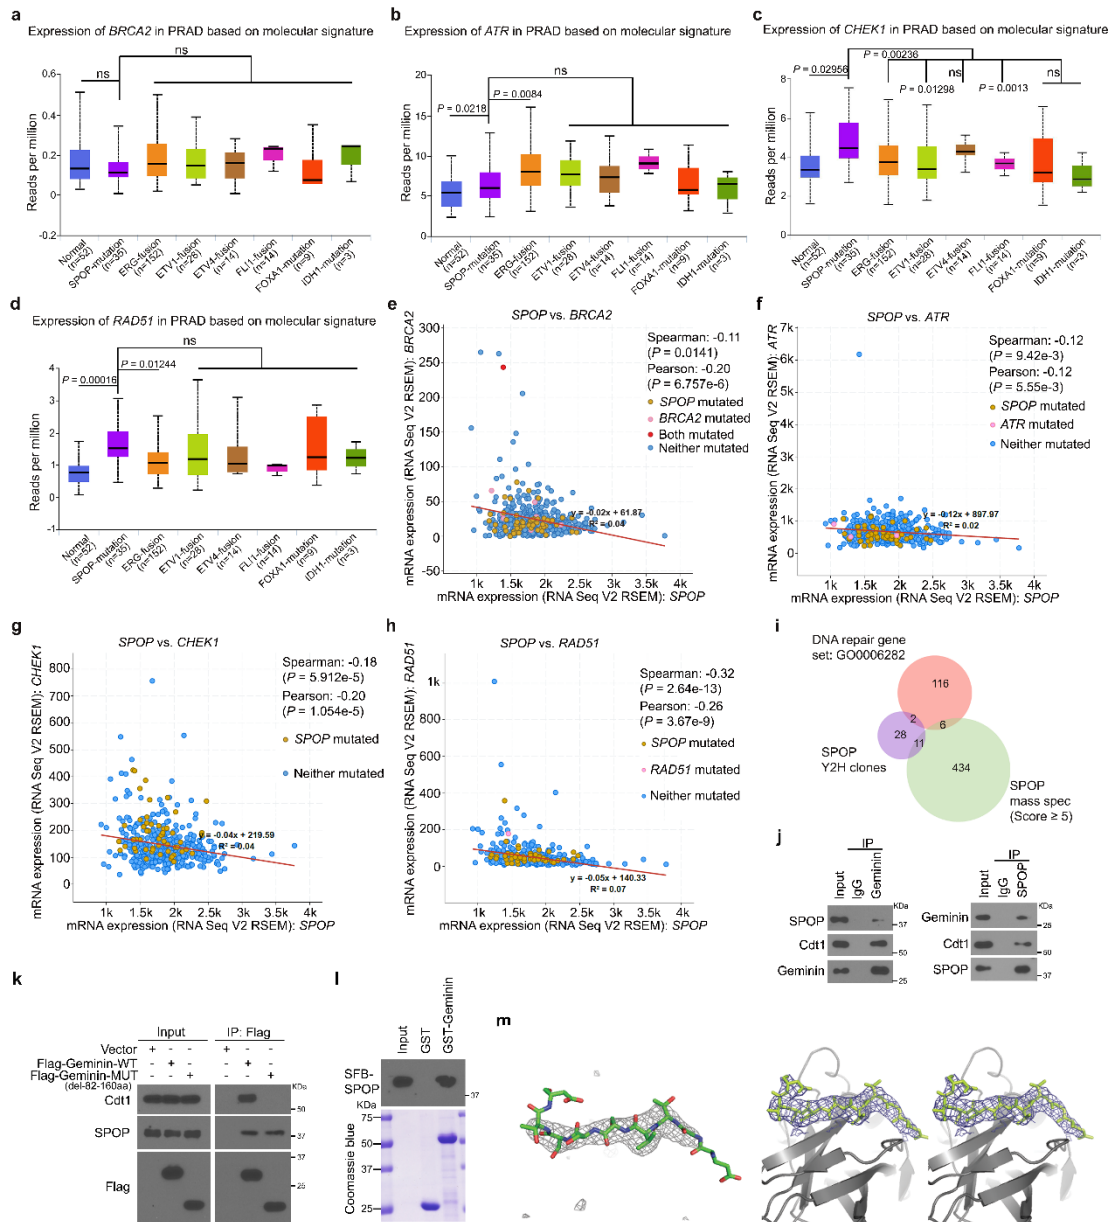

**Supplementary Fig. 1 Geminin binds to SPOP and SPOP mutations have no effects on the mRNA levels of *BRCA2*, *ATR*, *CHEK1* and *RAD51* in prostate cancer patient specimens.**

**a-d** The mRNA level of *BRCA2* (a), *ATR* (b), *CHEK1* (c) and *RAD51* (d) genes were compared between paired normal and tumor tissues from TCGA dataset. “n” represents the number of prostate cancer patients, boxplots shows minima, maxima and median. Two-tailed unpaired Student’s *t*-test; ns, not significant.

**e-h** The mRNA level of *BRCA2* (e), *ATR* (f), *CHEK1* (g) and *RAD51* (h) genes correlated to *SPOP* mRNA level. Two-tailed spearman's correlation and Pearson correlation.

**i** Venn diagram showing the overlap of yeast two-hybrid screen data, mass spectrometry-based SPOP interactome, and the DNA repair gene set.

**j** Co-IP analysis of endogenous proteins in 293T cells using the indicated antibodies.

**k** 293T cells were transiently transfected with Geminin-WT or Geminin (82-160 aa deletion) and harvested for co-IP.

**l** GST pulldown assay using *in vitro* transcribed and translated SFB-SPOP protein and GST or GST-Geminin recombinant protein purified from *E. coli*.

**m** Left:  $2mFo-DFc$  map of Geminin peptide in the X-ray structure of SPOP-MATH-Geminin peptide complex contoured at  $1\sigma$  level. Nine peptide residues were modeled in the electron density. Right:  $Fo-Fc$  omit map of the Geminin peptide in the X-ray structure of SPOP-MATH-Geminin peptide complex contoured at  $3\sigma$  level and shown in stereoview.

Source data are provided in this paper or Mendeley database

(<https://data.mendeley.com/datasets/8n7xt5rkhc/1>). Similar results for **j**, **k**, **l** panels were obtained in two independent experiments.

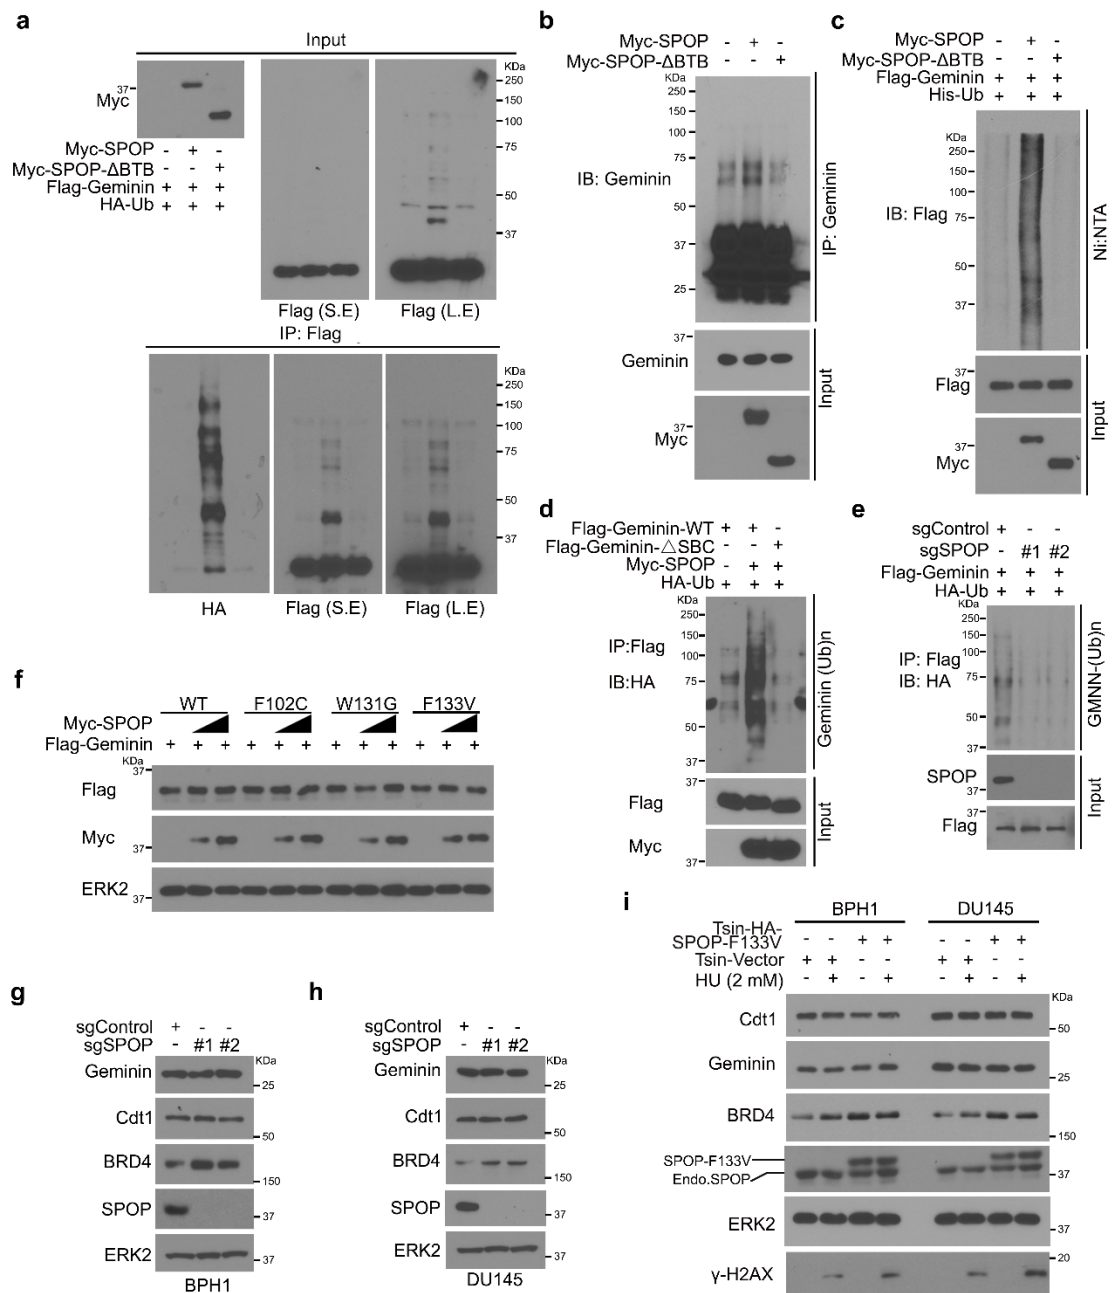

**Supplementary Fig. 2 SPOP mediates Geminin non-degradative ubiquitination.**

**a** 293T cells were transfected with the indicated plasmids and harvested for co-IP using anti-Flag-conjugated agarose beads. Ubiquitination from both input and IP samples were detected by indicated antibodies.

**b** 293T cells were transfected with the indicated plasmids and harvested for co-IP using anti-Geminin antibody and WB using indicated antibodies.

**c** 293T cells were transfected with the indicated plasmids and harvested for co-IP using Ni<sup>2+</sup>-NTA beads.

**d** 293T cells were transfected with the indicated plasmids and harvested for co-IP using anti-Flag-conjugated agarose beads.

**e** 293T EV and SPOP-KO cells were transfected with the indicated plasmids and harvested for ubiquitination assay.

**f** 293T cells were transfected with the indicated plasmids and the level of indicated proteins was examined by WB.

**g, h** EV and SPOP-KO BPH1 cells (**g**) and DU145 cells (**h**) were harvested for WB with indicated antibodies.

**i** BPH1 and DU145 EV or SPOP F133V cells are treated with or without 2 mM HU for 4 h and harvested for WB with indicated antibodies.

Source data are provided in this paper or Mendeley database

(<https://data.mendeley.com/datasets/8n7xt5rkhc/1>). Similar results for **a-i** panels were obtained in two independent experiments.

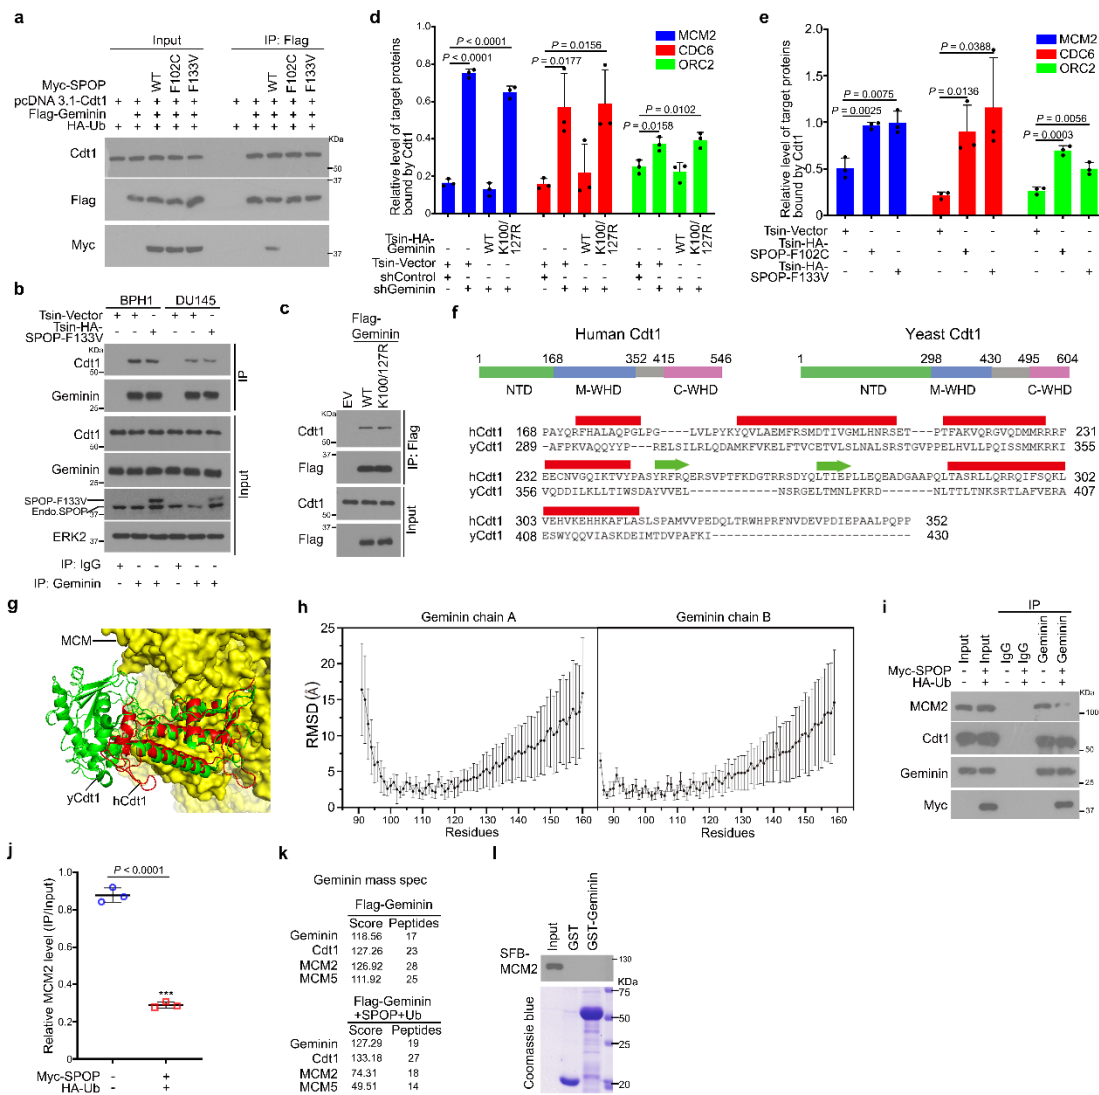

### Supplementary Fig. 3 SPOP-mediated poly-ubiquitination of Geminin inhibits Cdt1 binding of MCM protein.

**a** 293T cells were transfected with the indicated plasmids and harvested for co-IP assay.

**b** DU145 and BPH1 cells stably expressing empty vector or HA-SPOP F133V mutant were harvested for co-IP analysis of the interaction between endogenous Geminin and Cdt1 proteins. Similar results were obtained in at least two independent experiments.

**c** 293T cells were transfected with Flag-tagged Geminin WT or K100/127R mutant and harvested for co-IP analysis.

**d** Quantification data from three repeats of co-IP assay as shown in Fig. 4a. Data are presented as the mean  $\pm$  SD of three independent experiments (n=3). Two-tailed unpaired Student's *t*-test.

**e** Quantification data from three repeats of co-IP assay as shown in Fig. 4b. Data are presented as the mean  $\pm$  SD of three independent experiments. Two-tailed unpaired Student's *t*-test.

**f** The middle winged-helix domains (M-WHD) in human and yeast Cdt1 (hCdt1 and yCdt1) show high structural similarities despite low sequence similarities. Red bar and green arrow indicate helical and beta-strand secondary structural elements in both Cdt1.

**g** The crystal structure of hCdt1 M-WHD (complexed to Geminin, PDB 2WVR) superimposed to the corresponding region of yCdt1 (bound to OCCM, PDB 6WGG) shows good fit and absence of any hCdt1-MCM steric clash.

**h** Molecular dynamics simulations using the crystal structure of hCdt1-Geminin (PDB 2WVR) show large fluctuations in the C-terminal residues of the two Geminin chains with respect to hCdt1. The graphs show the root mean square fluctuation (RMSF) of each Geminin residue position calculated with GROMACS in reference to the hCdt1-Geminin crystal structure after optimal fitting to hCdt1 backbone atoms. RMSF values were computed using 32,500 snapshots from the MD trajectory.

**i, j** 293T cells were transfected with the indicated plasmids and harvested for co-IP assay. Quantification data from three repeats were shown in (j). Data are presented as the mean  $\pm$  SD of three independent experiments ( $n=3$ ). Two-tailed unpaired Student's t-test.

**k** Mass spectrometry results from Geminin with or without transfection with Myc-SPOP and HA-Ub.

**l** GST pulldown assay using *in vitro* transcribed and translated SFB-MCM2 protein and GST or GST-Geminin recombinant protein purified from *E. coli*.

Source data are provided in this paper or Mendeley database

(<https://data.mendeley.com/datasets/8n7xt5rkhc/1>). Similar results for **a, b, c, i** panels were obtained in two or three independent experiments.

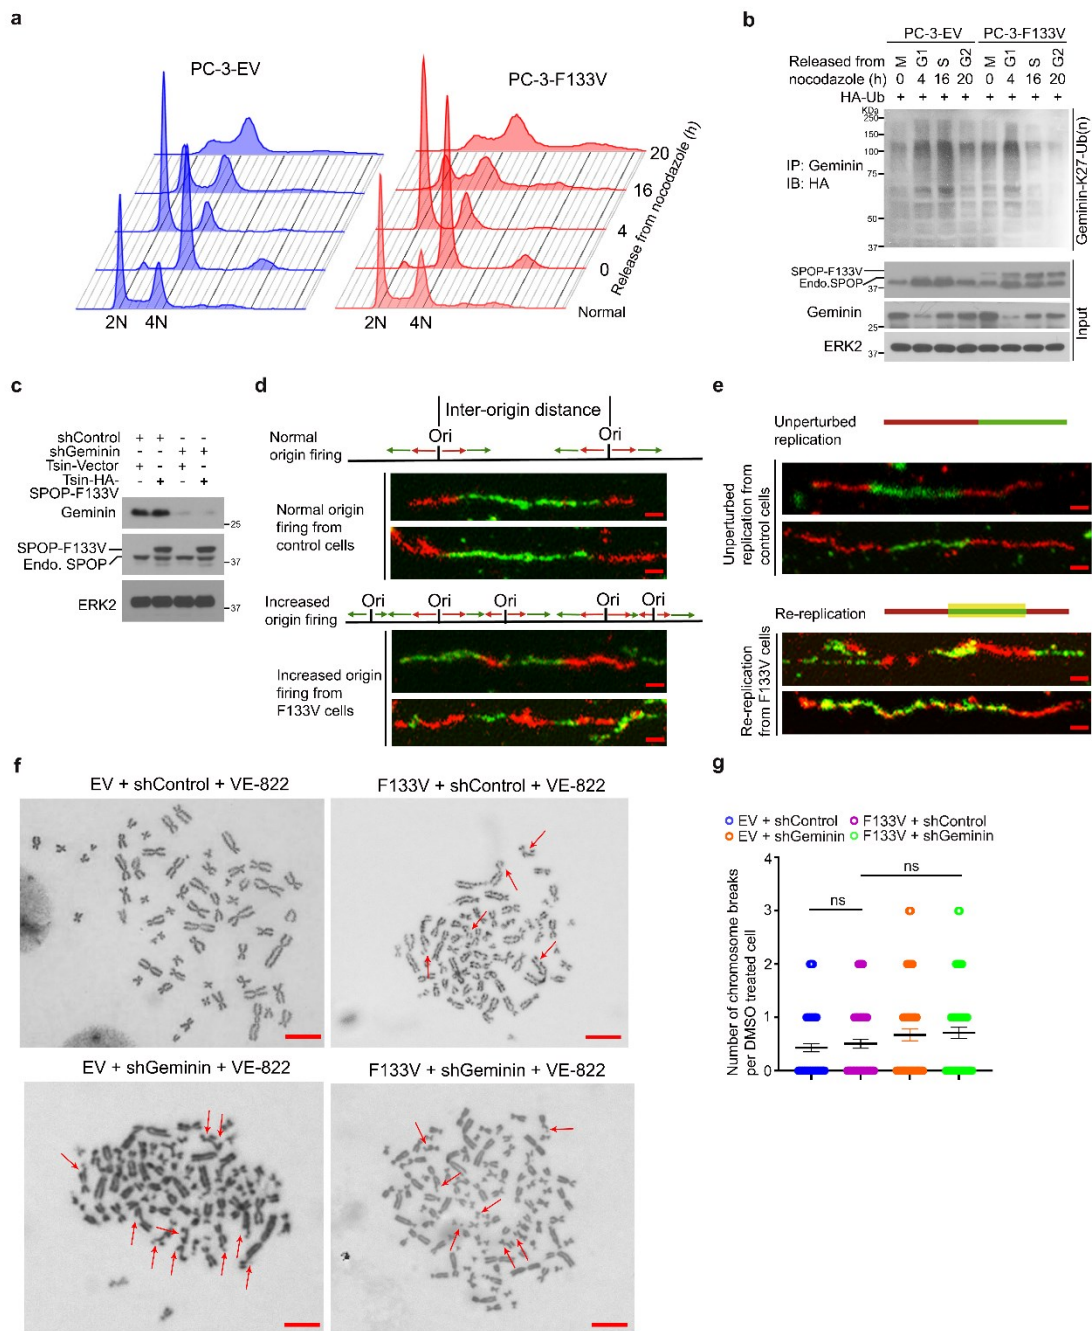

### Supplementary Fig. 4 SPOP mutations increased replication catastrophe upon ATR inhibition.

**a** FACS-based cell cycle analysis of cells treated as indicated in Fig. 5c.

**b** EV- and F133V-expressing PC-3 cells transfected with HA-Ub were synchronized with nocodazole, released at different time points and harvested for IP and WB.

**c** WB analysis of indicated proteins in cells transfected as indicated in Fig. 5e-h.

**d** Diagram showing inter-origin distance and representative images of DNA replication detected by DNA fiber assay in control (top) and F133V-expressing PC-3 cells (bottom). Scale bar, 2  $\mu$ m.



**e** Diagram showing re-replication and representative images of DNA replication detected by DNA fiber assay in control (top) and F133V-expressing PC-3 cells (bottom). Scale bar, 2  $\mu\text{m}$ .

**f** Representative images of metaphase chromosomes with breaks used for the quantitative data shown in Fig. 5j. Red arrows point to the chromosome breaks. Scale bar, 10  $\mu\text{m}$ .

**g** PC-3 cell lines were treated with DMSO for 24 h in parallel with experiments shown in Fig. 5j and harvested for karyotyping. Chromosome breaks per cell were quantified. More than 70 metaphases from 4 biological replicates were counted. Data are mean  $\pm$  SEM. Two-tailed unpaired Student's *t*-test; ns, not significant.

Source data are provided in this paper or Mendeley database (<https://data.mendeley.com/datasets/8n7xt5rkhc/1>). Similar results for **b**, **c** panels were obtained in two independent experiments.

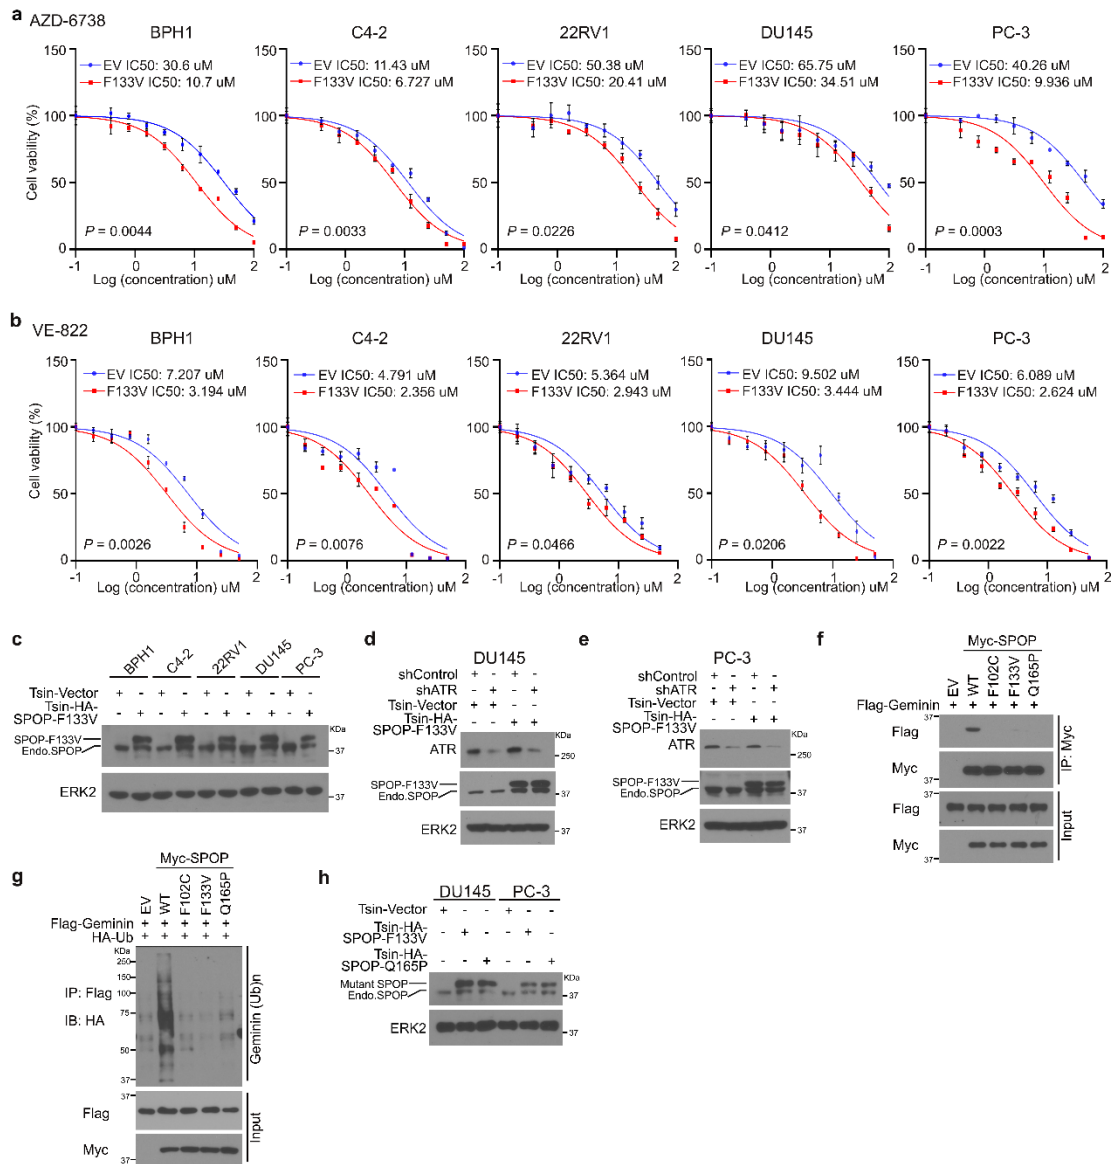

### Supplementary Fig. 5 SPOP mutant cells are sensitive to ATR pathway inhibition.

**a** Dose surviving curve of AZD6738 in five prostatic cell lines expressing EV or SPOP F133V. Cells were treated with the indicated doses of AZD6738 for 24 h. Data are shown as the mean  $\pm$  SD of three independent experiments (n=3 replicates/group). Two-tailed unpaired Student's *t*-test; \*\*  $P < 0.01$ , \*\*\*  $P < 0.001$ .

**b** Dose surviving curve of VE-822 in five prostatic cell lines expressing EV or SPOP F133V. Cells were treated with the indicated doses of VE-822 for 24 h. Data are shown as the mean  $\pm$  SD of three independent experiments (n=3 replicates/group). Two-tailed unpaired Student's *t*-test; \*\*  $P < 0.01$ , \*\*\*  $P < 0.001$ .

**c** WB analysis of indicated proteins in cell lines expressing EV or SPOP F133V prior to the treatments as indicated in (a) and (b).

**d, e** WB analysis of indicated proteins in DU145 (d) and PC-3 cells (e) infected with indicated lentivirus as the cells used for Fig. 6b.

**f** 293T cells were transfected with indicated plasmids and harvested for co-IP assay.

**g** 293T cells were transfected with indicated plasmids and harvested for ubiquitination assay.

**h** WB analysis of indicated proteins in cells infected with indicated lentivirus as the cells used for Fig. 6d, e.

Source data are provided in this paper or Mendeley database

(<https://data.mendeley.com/datasets/8n7xt5rkhc/1>). Similar results for **c-h** panels were obtained in two independent experiments.

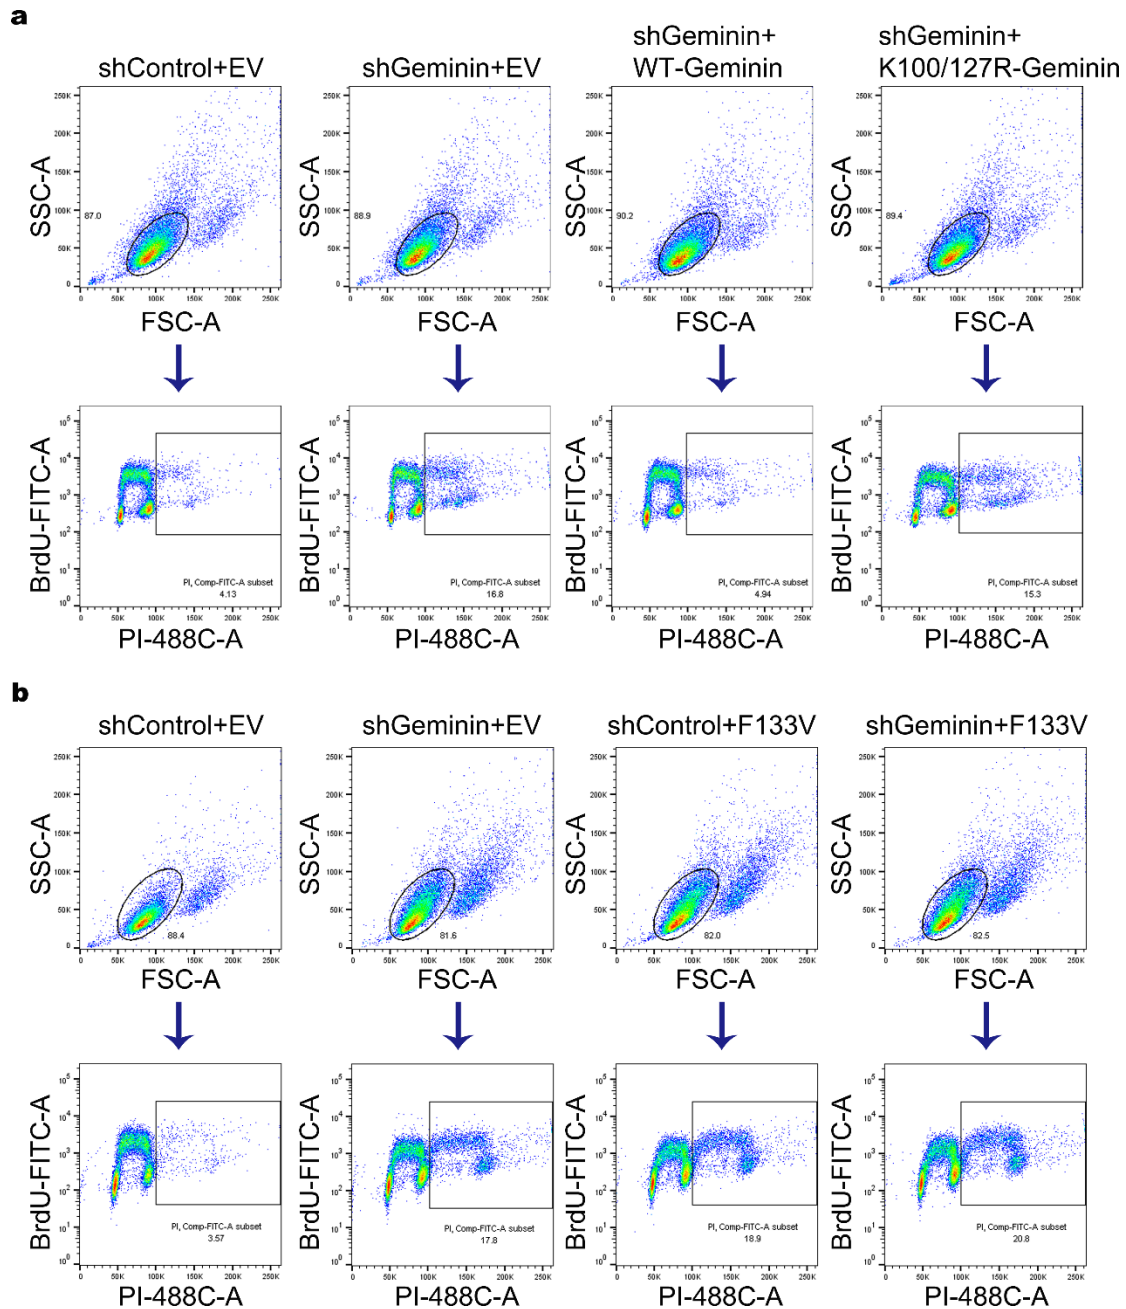

**Supplementary Fig. 6 Related to Figure. 5 and Figure. 6. Flow cytometry gating strategy.**

**a** BrdU incorporation measured by flow cytometry of PC-3 cells infected with lentivirus expressing control shRNA or Geminin-specific shRNA in combination with empty vector (EV), Geminin WT or K100/127R mutant related to Figure. 5e. Single cells gated by Forward Scatter (FSC-A) versus Side Scatter (SSC-A) plots were shown at top. The gated singlet population was displayed in a FITC-A (BrdU) versus 488C-A (DNA) plot. Cells with DNA content  $>4N$  were gated at bottom. 20,000 singlet events were collected for each experiment.

**b** BrdU incorporation measured by flow cytometry of PC-3 cells infected with lentivirus expressing EV or SPOP F133V in combination with control or Geminin-

specific shRNAs related to Figure. 6e. Single cells gated by Forward Scatter (FSC-A) versus Side Scatter (SSC-A) plots were shown at top. The gated singlet population was displayed in a FITC-A (BrdU) versus 488C-A (DNA) plot. Cells with DNA content  $>4N$  were gated at bottom. 20,000 singlet events were collected for each experiment.

**Supplementary Table 1. The lists of DNA repair and replication genes**

| Regulation of DNA repair: GO:0006282 |                |           | Regulation of DNA replication<br>GO:0006275 |          |        |
|--------------------------------------|----------------|-----------|---------------------------------------------|----------|--------|
| POLH                                 | FUS            | MRNIP     | DBP                                         | ENPP7    | RAD17  |
| PCNA                                 | PPP4C          | TEX15     | STOML2                                      | GLI1     | INO80  |
| WAS                                  | CHEK1          | PARP1     | PCNA                                        | CHEK2    | WIZ    |
| MAD2L2                               | XRCC1          | BRCA1     | BLM                                         | BRCA2    | TERF1  |
| OTUB1                                | RTEL1          | SPIRE2    | NUCKS1                                      | DNA2     | TSPYL2 |
| LOC107984078                         | CYREN          | TWIST1    | GLI2                                        | SENP2    | ZNF830 |
| NUDT16                               | SIRT6          | SPIRE1    | ATG7                                        | TICRR    | EHMT2  |
| RMI2                                 | SETMAR         | USP1      | CCNA2                                       | CDK1     | JUN    |
| FBH1                                 | ZNF365         | CEBPG     | FBXO5                                       | S100A11  | RFC2   |
| PARP3                                | TERF2          | ERCC8     | MSH3                                        | CHTF8    | RFC4   |
| FIGN                                 | NPAS2          | WRAP53    | DACH1                                       | TP53     | PAP    |
| DDX11                                | RNF168         | UBE2N     | RFC3                                        | TNFAIP1  | UL42   |
| POLQ                                 | EYA3           | EYA1      | RFC5                                        | CACYBP   | NPM2   |
| FMN2                                 | SHLD1          | ABRAXAS1  | FBH1                                        | STAG2    | ESCO2  |
| FANCB                                | NSD2           | UBE2V2    | ZMPSTE24                                    | UCN      | DBF4   |
| SIRT1                                | APBB1          | KLHL15    | GMNN                                        | RAC1     |        |
| RPA2                                 | SLF2           | KDM1A     | ZBTB38                                      | FGF10    |        |
| EYA4                                 | H2AFX          | FOXM1     | LIG3                                        | PDS5A    |        |
| HMGA2                                | EYA2           | CSB-PGBD3 | EGFR                                        | MAS1     |        |
| EGFR                                 | RTEL1-TNFRSF6B | DHX9      | SMC1A                                       | SMARCAL1 |        |
| RAD51AP1                             | FAM168A        | NUDT16L1  | GDF2                                        | DONSON   |        |
| AXIN2                                | CBX8           | AUNIP     | CDT1                                        | NBN      |        |
| TRIP12                               | RNF8           | SHLD3     | MSH6                                        | HUS1     |        |
| RNF169                               | MGMT           | PML       | EREG                                        | AICDA    |        |
| HELB                                 | DTX3L          | RAD51     | ESCO1                                       | GTPBP4   |        |
| TP53BP1                              | RAD52          | TIGAR     | ZRANB3                                      | CDK2     |        |
| FIGNL2                               | PARP9          | WDR70     | ID3                                         | CTC1     |        |
| HMGB1                                | PARG           | OGG1      | FBXW7                                       | ATAD5    |        |
| SLF1                                 | MAGEF1         |           | ATR                                         | TIPIN    |        |
| HDAC10                               | USP51          |           | RBBP6                                       | NUGGC    |        |
| RECQL5                               | FGF10          |           | BCL6                                        | USP37    |        |
| RPS3                                 | RADX           |           | CDC7                                        | DBF4B    |        |
| BRCC3                                | UBE2V1         |           | WAPL                                        | CDC6     |        |
| HSF1                                 | FIGNL1         |           | ACVRL1                                      | E2F7     |        |
| PRKCG                                | UIMC1          |           | PPP2CA                                      | HCRT     |        |
| CDK9                                 | TFIP11         |           | WRNIP1                                      | TTF1     |        |
| UBR5                                 | PRKDC          |           | E2F8                                        | CDAN1    |        |
| PARPBP                               | SHLD2          |           | DSCC1                                       | WDR18    |        |

**Supplementary Table 1 continued**

| Regulation of DNA repair: GO:0006282 |         |  | Regulation of DNA replication<br>GO:0006275 |         |  |
|--------------------------------------|---------|--|---------------------------------------------|---------|--|
| TMEM161A                             | ERCC6   |  | TIMELESS                                    | ATRX    |  |
| BABAM1                               | CUL4A   |  | MAP2K4                                      | HRAS    |  |
| WRNIP1                               | SETD2   |  | PPP2R1A                                     | KCTD13  |  |
| SMCHD1                               | RIF1    |  | MCIDAS                                      | FGFR1   |  |
| KDM4D                                | TERF2IP |  | SLFN11                                      | CCDC88A |  |
| CGAS                                 | MMS19   |  | ATF1                                        | MRE11   |  |
| TIMELESS                             | ACTR2   |  | ANKRD17                                     | STN1    |  |
| SPIDR                                | TRIM28  |  | ZNF365                                      | FAF1    |  |
| DEK                                  | BABAM2  |  | TERF2                                       | DHX9    |  |
| UBQLN4                               | PPP4R2  |  | CHTF18                                      | SMC3    |  |

**Supplementary Table 2. SPOP putative binding proteins identified via Y2H screen**

| Gene name | Hits |
|-----------|------|
| BRD2      | 52   |
| CHD3      | 35   |
| CAPRIN1   | 31   |
| ZMYND8    | 16   |
| SETD2     | 12   |
| BRD4      | 6    |
| GLI3      | 6    |
| DAXX      | 6    |
| H2AFY     | 5    |
| SRRM1     | 5    |
| INF2      | 4    |
| UBE2I     | 4    |
| RANBP9    | 4    |
| ZCCHC12   | 4    |
| SPOP      | 4    |
| NUDCD3    | 4    |
| GCC2      | 4    |
| PIAS3     | 4    |
| RBFOX2    | 4    |
| CBX4      | 4    |
| AMOTL2    | 4    |
| FAF1      | 3    |
| GMNN      | 3    |
| BRD3      | 2    |
| GLI2      | 2    |
| RBPJ      | 2    |

**Supplementary Table 2 continued**

| Gene name | Hits |
|-----------|------|
| CHAF1A    | 2    |
| DEK       | 2    |
| NCOA3     | 1    |
| PIAS1     | 1    |
| TCOF1     | 1    |
| SUMO1     | 1    |
| RPRD2     | 1    |
| MRE11A    | 1    |
| LRCH4     | 1    |
| KPNA5     | 1    |
| HMGCS1    | 1    |
| GMEB1     | 1    |
| DHX15     | 1    |
| CTDSPL2   | 1    |
| CACUL1    | 1    |

**Supplementary Table 3. SPOP putative binding partners identified via mass spectrometry**

| Gene name | Hits | Gene name | Hits | Gene name | Hits | Gene name | Hits |
|-----------|------|-----------|------|-----------|------|-----------|------|
| SPOP      | 106  | CEP170    | 25   | ATP5B     | 20   | HIST1H1E  | 17   |
| NUP153    | 69   | NCL       | 25   | CKAP5     | 20   | HSPH1     | 17   |
| TPR       | 67   | ACACA     | 24   | FASN      | 20   | MATR3     | 17   |
| NUP50     | 62   | COPA      | 24   | KPNA2     | 20   | SERBP1    | 17   |
| HNRNPK    | 41   | HSPA8     | 24   | LMNB2     | 20   | HDLBP     | 16   |
| DDX21     | 38   | HSPD1     | 24   | CUL3      | 19   | ILF3      | 16   |
| CAPRIN1   | 35   | IGF2BP1   | 24   | EIF4A1    | 19   | KLHL7     | 16   |
| KCTD12    | 35   | TUBB2A    | 24   | HSPA5     | 19   | LMNA      | 16   |
| KPNA6     | 34   | PARP1     | 24   | ILF2      | 19   | NPM1      | 16   |
| G3BP2     | 33   | DLAT      | 23   | KPNA5     | 19   | RBM14     | 16   |
| DHX9      | 32   | HNRNPM    | 23   | NONO      | 19   | RPS18     | 16   |
| KPNB1     | 32   | DHX15     | 23   | DDX1      | 18   | RPS2      | 16   |
| RPRD2     | 32   | RTCB      | 22   | EEF2      | 18   | CCT2      | 15   |
| G3BP1     | 30   | XRCC6     | 22   | IRS4      | 18   | HSPA1L    | 15   |
| TUBA1A    | 30   | DDX5      | 21   | MCM3      | 18   | LARP1     | 15   |
| DDX17     | 29   | EEF1A1    | 21   | PC        | 18   | PHB2      | 15   |
| PABPC1    | 29   | ENO1      | 21   | PKM       | 18   | RPL4      | 15   |
| HNRNPU    | 28   | KPNA1     | 21   | PRDX1     | 18   | SF3B2     | 15   |
| DBT       | 27   | PTBP1     | 21   | SF3B3     | 18   | TCERG1    | 15   |
| RPS3      | 27   | RPS3A     | 21   | VIM       | 18   | TCP1      | 15   |
| RPS4X     | 26   | SUFU      | 21   | ACTA2     | 17   | TUFM      | 15   |
| SYNCRIP   | 26   | ATP5A1    | 20   | EIF4A3    | 17   | ZMYND8    | 15   |



**Supplementary Table 3 continued**

| Gene name | Hits | Gene name | Hits | Gene name | Hits | Gene name | Hits |
|-----------|------|-----------|------|-----------|------|-----------|------|
| DHX30     | 14   | HNRNPA0   | 11   | RUVBL2    | 10   | DDX6      | 8    |
| HSPA1A    | 14   | HNRNPA2B1 | 11   | STAU1     | 10   | DIS3      | 8    |
| HSPA9     | 14   | HNRNPF    | 11   | ZC3H11A   | 10   | DRG1      | 8    |
| IQGAP1    | 14   | HSP90AB1  | 11   | ZC3HAV1   | 10   | EIF2S2    | 8    |
| MYBBP1A   | 14   | IMPDH2    | 11   | ZNF687    | 10   | ELAVL1    | 8    |
| RPL7      | 14   | MCCC1     | 11   | ANP32A    | 9    | FBL       | 8    |
| RPS14     | 14   | PSMC3     | 11   | ANXA2     | 9    | GARS      | 8    |
| XRCC5     | 14   | RBM26     | 11   | ATP5C1    | 9    | GNL3      | 8    |
| GLI3      | 14   | RPS16     | 11   | C14orf166 | 9    | HCFC1     | 8    |
| GTPBP4    | 14   | RPS19     | 11   | CCT4      | 9    | HIST1H1A  | 8    |
| SMC1A     | 14   | RPS7      | 11   | CYFIP1    | 9    | HNRNPA1L2 | 8    |
| DDX3Y     | 13   | RSL1D1    | 11   | GLYR1     | 9    | HNRNPC    | 8    |
| MAP4      | 13   | RUVBL1    | 11   | GNB2L1    | 9    | HSPA2     | 8    |
| MCCC2     | 13   | SLC25A4   | 11   | HNRNPA1   | 9    | IGF2BP2   | 8    |
| MTHFD1    | 13   | SNRNP200  | 11   | HNRNPH1   | 9    | KPNA4     | 8    |
| NUP107    | 13   | TRIM24    | 11   | HP1BP3    | 9    | LUC7L2    | 8    |
| PHB       | 13   | UPF1      | 11   | HSP90AB3P | 9    | NXF1      | 8    |
| RBM45     | 13   | XRN2      | 11   | KIF22     | 9    | PAICS     | 8    |
| RPL3      | 13   | YWHAE     | 11   | KIF2A     | 9    | PRPF19    | 8    |
| RPL7A     | 13   | INF2      | 11   | MCM5      | 9    | PSMD1     | 8    |
| SF3B1     | 13   | ATXN2L    | 10   | NUP98     | 9    | PSMD3     | 8    |
| SPOPL     | 13   | CALD1     | 10   | PDCD11    | 9    | PTRF      | 8    |
| ACLY      | 12   | DNAJA1    | 10   | PHGDH     | 9    | RPL21     | 8    |
| AHCY      | 12   | EEF1G     | 10   | RPL10     | 9    | RPL5      | 8    |
| ATAD3A    | 12   | EIF2A     | 10   | RPL17     | 9    | RPS17L    | 8    |
| CKAP4     | 12   | EPRS      | 10   | RPL26L1   | 9    | SF1       | 8    |
| EIF4G1    | 12   | FARSA     | 10   | RPL8      | 9    | SLC25A3   | 8    |
| MOV10     | 12   | HIST1H4A  | 10   | RPL9      | 9    | TUBB      | 8    |
| PABPC4    | 12   | HNRNPD    | 10   | RPS15A    | 9    | USP10     | 8    |
| PCCA      | 12   | HNRNPL    | 10   | TPX2      | 9    | XPO1      | 8    |
| PCCB      | 12   | HNRNPR    | 10   | TUBB3     | 9    | YBX1      | 8    |
| PPP1R12A  | 12   | IGF2BP3   | 10   | U2AF2     | 9    | PCNA      | 8    |
| RPL23A    | 12   | MCM7      | 10   | SMC3      | 9    | TRIM28    | 8    |
| RPS9      | 12   | NUP133    | 10   | ABCF1     | 8    | CCT3      | 7    |
| SFPQ      | 12   | PDHX      | 10   | ACTB      | 8    | CCT5      | 7    |
| TUBB1     | 12   | PSMC2     | 10   | AIFM1     | 8    | CCT7      | 7    |
| UBA52     | 12   | PSMD11    | 10   | ATP1A1    | 8    | COPB1     | 7    |
| CACUL1    | 12   | RBMX      | 10   | ATP5O     | 8    | CPSF7     | 7    |
| FUS       | 12   | RPL13     | 10   | BUB3      | 8    | DHX36     | 7    |
| DCTN2     | 11   | RPL6      | 10   | DCTN1     | 8    | DLD       | 7    |
| HADHA     | 11   | RPS6      | 10   | DDX52     | 8    | DNAJC7    | 7    |

**Supplementary Table 3 continued**

| Gene name | Hits | Gene name | Hits | Gene name | Hits | Gene name | Hits |
|-----------|------|-----------|------|-----------|------|-----------|------|
| EFTUD2    | 7    | DDX54     | 6    | RPRD1B    | 6    | DNAJA3    | 5    |
| GLUD1     | 7    | DKC1      | 6    | RPS11     | 6    | EIF2S3L   | 5    |
| HIST1H1C  | 7    | EIF2AK2   | 6    | RPS24     | 6    | EIF3A     | 5    |
| HNRNPH2   | 7    | ERP44     | 6    | RPS25     | 6    | EIF5A     | 5    |
| HSP90AB2P | 7    | FAM98A    | 6    | RTN4      | 6    | EWSR1     | 5    |
| KIFC1     | 7    | FNBP4     | 6    | SETD1A    | 6    | EZR       | 5    |
| LRRC59    | 7    | GCC1      | 6    | SHMT2     | 6    | FAF2      | 5    |
| NUP160    | 7    | HAT1      | 6    | SKIV2L2   | 6    | FEN1      | 5    |
| PDHB      | 7    | HNRNPA3   | 6    | SND1      | 6    | FLNA      | 5    |
| PRMT1     | 7    | IRF2BP2   | 6    | SRSF1     | 6    | GSR       | 5    |
| PRRC2A    | 7    | KHDRBS1   | 6    | TMPO      | 6    | GTPBP1    | 5    |
| PYCR2     | 7    | KHSRP     | 6    | TMPO      | 6    | H1FO      | 5    |
| RANBP2    | 7    | KIF2C     | 6    | TUBB4A    | 6    | HADHB     | 5    |
| RBM25     | 7    | KIF5B     | 6    | UBA1      | 6    | HIST1H2AA | 5    |
| RECQL     | 7    | LARP4B    | 6    | VDAC2     | 6    | HNRNPAB   | 5    |
| RPL10A    | 7    | LARS      | 6    | YTHDC2    | 6    | HNRNPCL3  | 5    |
| RPL18     | 7    | LMNB1     | 6    | YTHDF2    | 6    | HSD17B10  | 5    |
| RPL31     | 7    | LRRC47    | 6    | YWHAB     | 6    | HSD17B4   | 5    |
| RPL38     | 7    | NOP56     | 6    | ZCCHC3    | 6    | HSP90AA1  | 5    |
| RPS13     | 7    | NSUN2     | 6    | ZRANB1    | 6    | HSPA4     | 5    |
| RPS8      | 7    | NUDT21    | 6    | CDK1      | 6    | IARS      | 5    |
| RXRB      | 7    | NUFIP2    | 6    | ABCE1     | 5    | KCTD16    | 5    |
| SARS2     | 7    | PCBP1     | 6    | ADAR      | 5    | KPNA3     | 5    |
| SEC24C    | 7    | PGAM5     | 6    | ALDH18A1  | 5    | LRPPRC    | 5    |
| SLC25A11  | 7    | POLR2A    | 6    | ALKBH5    | 5    | MTHFD1L   | 5    |
| SLC25A13  | 7    | POLR2B    | 6    | AP2A1     | 5    | NAT10     | 5    |
| SNRPA1    | 7    | PPP1CA    | 6    | ARMC8     | 5    | NDUFA10   | 5    |
| TUBB6     | 7    | PRPF40A   | 6    | CAPZA1    | 5    | NKRF      | 5    |
| USP7      | 7    | PSMC5     | 6    | CAT       | 5    | NME1      | 5    |
| VCP       | 7    | PSMC6     | 6    | CC2D1A    | 5    | NMT1      | 5    |
| DAXX      | 7    | PSMD13    | 6    | CCT8      | 5    | NOP2      | 5    |
| PPP2R1A   | 7    | PUF60     | 6    | CDK4      | 5    | NTPCR     | 5    |
| ANP32E    | 6    | PURA      | 6    | CKAP2     | 5    | NUSAP1    | 5    |
| ATXN2     | 6    | RANGAP1   | 6    | CLPB      | 5    | OAT       | 5    |
| CDC5L     | 6    | RBBP4     | 6    | CLTC      | 5    | PFAS      | 5    |
| CDKN2AIP  | 6    | RCC2      | 6    | CNP       | 5    | PGM3      | 5    |
| CEP170P1  | 6    | RPL13A    | 6    | COPG1     | 5    | POLDIP3   | 5    |
| COPB2     | 6    | RPL15     | 6    | CTNNA1    | 5    | PRDX2     | 5    |
| DARS      | 6    | RPL23     | 6    | DDX47     | 5    | PRPF8     | 5    |
| DDX3X     | 6    | RPLP0P6   | 6    | DHX57     | 5    | PRPSAP1   | 5    |
| DDX50     | 6    | RPP30     | 6    | DNAJA2    | 5    | PSMA2     | 5    |

**Supplementary Table 3 continued**

| Gene name | Hits | Gene name | Hits | Gene name | Hits | Gene name | Hits |
|-----------|------|-----------|------|-----------|------|-----------|------|
| PSMC1     | 5    | SLC25A5   | 5    | GMNN      | 5    | ZC3H15    | 5    |
| PSME3     | 5    | SRSF3     | 5    | RFC4      | 5    | RPL22     | 5    |
| PYCR1     | 5    | SRSF9     | 5    | RPL27     | 5    | RPL19     | 5    |
| RAN       | 5    | STRAP     | 5    | RPLP2     | 5    | YWHAQ     | 5    |
| RBM39     | 5    | TK1       | 5    | RPN1      | 5    | SLC25A12  | 5    |
| RCC1      | 5    | TRIM25    | 5    | RPRD1A    | 5    | RPL14     | 5    |
| RNMT      | 5    | TSR1      | 5    | RPS10P5   | 5    | USP39     | 5    |
| RPL11     | 5    | TXN       | 5    | RPS23     | 5    | SERPINH1  | 5    |
| RPL12     | 5    | U2SURP    | 5    | RRP1B     | 5    |           |      |
|           |      |           |      |           |      |           |      |

**Supplementary Table 4 Resource information.** Hyperlinks need to be copy-pasted into the browser.

| REAGENT or RESOURCE                                      | SOURCE                    | IDENTIFIER                                        |
|----------------------------------------------------------|---------------------------|---------------------------------------------------|
| <b>Antibodies</b>                                        |                           |                                                   |
| Mouse monoclonal anti-Geminin                            | Santa Cruz                | Cat# sc-74456;<br>RRID: AB_1124963                |
| Mouse monoclonal anti-Cdt1                               | Santa Cruz                | Cat# sc-365305,<br>RRID: AB_10847805              |
| Mouse monoclonal anti-MCM2                               | Santa Cruz                | Cat# sc-373702,<br>RRID: AB_10917436              |
| Mouse monoclonal anti-MCM3                               | Santa Cruz                | Cat# SC-166940;<br>N/A                            |
| Mouse monoclonal anti-MCM4                               | Santa Cruz                | Cat# sc-28317;<br>RRID: AB_627916                 |
| Mouse monoclonal anti-MCM7                               | Santa Cruz                | Cat# sc-9966;<br>RRID: AB_627235                  |
| Mouse monoclonal anti-Cdc6                               | Santa Cruz                | Cat# sc-9964;<br>RRID: AB_627236                  |
| Mouse monoclonal anti-ORC2                               | Santa Cruz                | Cat# sc-32734;<br>RRID: AB_2157726                |
| Mouse monoclonal anti-HA.11                              | Covance                   | Cat#MMS-101R;<br>RRID: AB_291262                  |
| Rabbit polyclonal anti-BRD4                              | Abcam                     | Cat# ab1228874;<br>N/A                            |
| Rabbit polyclonal anti-SPOP                              | Proteintech Group         | Cat# 16750-1-AP;<br>N/A                           |
| Mouse monoclonal anti-Myc                                | Santa Cruz                | Cat# sc-40;<br>RRID: AB_627268                    |
| Mouse monoclonal anti-Flag                               | Sigma                     | Cat # F-3165;<br>RRID: AB_259529                  |
| Mouse monoclonal anti-ERK2                               | Santa Cruz                | Cat# sc-1647;<br>RRID: AB_627547                  |
| Rabbit monoclonal anti- Phospho Histone H2A.X (S139)     | Cell Signaling Technology | Cat# 9718;<br>RRID: AB_2118009                    |
| Goat anti-Rabbit IgG (H+L) Alexa Fluor 594               | Thermo Fisher             | Cat # A11037;<br>RRID: <a href="#">AB_2534095</a> |
| Peroxidase IgG Fraction Monoclonal Mouse Anti-Rabbit IgG | Jackson ImmunoResearch    | Cat# 211-032-171;<br>RRID: AB_2339149             |
| Peroxidase AffiniPure Goat Anti-Mouse IgG                | Jackson ImmunoResearch    | Cat#115-035-174;<br>RRID: AB_2338512              |
| Rat monoclonal anti-BrdU                                 | Abcam                     | Cat# ab6326;<br>RRID: AB_305426                   |
| Mouse monoclonal anti-BrdU                               | BD Bioscience             | Cat# 347580;<br>RRID: AB_400326                   |

**Supplementary Table 4 continued**

|                                                     |                     |                                                   |
|-----------------------------------------------------|---------------------|---------------------------------------------------|
| Goat anti-Mouse IgG (H+L) Alexa Fluor 488           | Thermo Fisher       | Cat # A11029;<br>RRID: <a href="#">AB_138404</a>  |
| Alexa Fluor 488 Goat Anti-Rat IgG (H+L)             | Life Technologies   | Cat# A-11006,<br>RRID: <a href="#">AB_2534074</a> |
| Mouse-IgGκ BP-FITC                                  | Santa Cruz          | Cat# sc-516140,<br>RRID: N/A                      |
| <b>Bacterial and Virus Strains</b>                  |                     |                                                   |
| <i>E. coli</i> DH5α                                 | Thermo Fisher       | Cat#18258012                                      |
| <i>E. coli</i> : BL21(DE3)                          | New England Biolabs | Cat#C2527H                                        |
| lentivirus-expressing shNS control (human)          | Sigma-Aldrich       | SHCLNG-NM_001                                     |
| lentivirus-expressing shGeminin (human)             | Sigma-Aldrich       | SHCLNV-NM_015895                                  |
| lentivirus-expressing shATR (human)                 | Sigma-Aldrich       | SHCLND-NM_001184                                  |
| <b>Chemicals, Peptides and Recombinant Proteins</b> |                     |                                                   |
| MG132                                               | EMD Chemicals       | Cat# 474790                                       |
| Lipofectamine 2000 reagent                          | Thermo Fisher       | Cat# 11668500                                     |
| Protein A/G agarose beads                           | Thermo Fisher       | Cat# 20423                                        |
| 5-Iodo-2'-deoxyuridine Idoxuridine (IDU)            | Cayman              | Cat# 20222-1                                      |
| 5-Chloro-2'-deoxyuridine (CIDU)                     | Cayman              | Cat# 18155-50                                     |
| VE-822                                              | TargetMol           | Cat# 1232416-25-9                                 |
| AZD6738                                             | Selleck Chemicals   | Cat# S7693                                        |
| Matrigel matrix                                     | BD Bioscience       | Cat# 354234                                       |
| Geminin SBC peptides                                | Mujin Biotech       | Cat# MJ190704                                     |
| LB broth, Miller (Luria-Bertani)                    | Difco               | Cat#244610                                        |
| LB agar, Miller (Luria Bertani)                     | Difco               | Cat#244520                                        |
| M9 minimal salts 5x                                 | Difco               | Cat#248510                                        |
| Ampicillin                                          | Gold Biotechnology  | Cat#A-301-100                                     |
| IPTG                                                | RPI                 | Cat#32115                                         |
| Tris                                                | Bio-Rad             | Cat#161-0716                                      |
| Sodium phosphate monobasic                          | Fisher              | Cat#BP329-1                                       |
| Sodium phosphate dibasic                            | Fisher              | Cat#S373-3                                        |
| Potassium phosphate monobasic                       | Fisher              | Cat#BP362-1                                       |
| Sodium chloride                                     | Fisher              | Cat#S271-10                                       |
| Potassium chloride                                  | Alfa Aesar          | Cat#A11662                                        |
| Imidazole                                           | Acros               | Cat#122025000                                     |
| Nickel sulfate                                      | Alfa Aesar          | Cat#12514                                         |
| EDTA                                                | Acros               | Cat#40993-0010                                    |
| PMSF                                                | MP                  | Cat#195381                                        |
| Dithiothreitol                                      | BioWorld            | Cat#705325                                        |

**Supplementary Table 4 continued**

|                                                     |                                             |                 |
|-----------------------------------------------------|---------------------------------------------|-----------------|
| <sup>15</sup> N, ammonium chloride                  | Sigma                                       | Cat#299251-1G   |
| Deuterium oxide                                     | CIL                                         | Cat#DLM-4-1000  |
| Isogro <sup>15</sup> N powder growth medium         | Sigma                                       | Cat#606871      |
| PEG 3350                                            | Hampton                                     | Cat#HR2-527     |
| Xylitol                                             | Sigma                                       | Cat#113K0033    |
| <b>Critical Commercial Assays</b>                   |                                             |                 |
| KOD Plus Mutagenesis Kit                            | Toyobo                                      | Cat# F0936K     |
| NE-PER™ Nuclear and Cytoplasmic Extraction Reagents | Thermo Fisher                               | Cat# 78833      |
| Red Blood Cell (RBC) Lysis Buffer                   | BioLegend                                   | Cat# 422401     |
| SignalStain® DAB Substrate Kit                      | Cell Signaling Technology                   | Cat# 8059       |
| QIAquick Gel Extraction Kit                         | Qiagen                                      | Cat # 28704     |
| <b>Primer List</b>                                  |                                             |                 |
| His-SPOP-MATH-F                                     | GGAATTCATATGGTAGTGAAATTCTCCTACATGT          |                 |
| His-SPOP-MATH-R                                     | CGCGGATCCATTACCCAGAGGTCTCCAAGAC             |                 |
| Geminin 27K-R-F:                                    | CGGATGATTCAGCCTTCTGCA                       |                 |
| Geminin 27K-R-R:                                    | CAGAGTTCTTCTTGGGACAGA                       |                 |
| Geminin 50K-R-F:                                    | CGGAGGAAACATCGGAATGAC                       |                 |
| Geminin 50K-R-R:                                    | GGACAAGCCTGCGGACAGCTC                       |                 |
| Geminin 100K-R-F:                                   | CGGGAAGTGGCAGAAAACGG                        |                 |
| Geminin 100K-R-R:                                   | CCAATACTGAGAGGATGGATT                       |                 |
| Geminin 127K-R-F:                                   | CGGGACAATGAAATTGCCCGC                       |                 |
| Geminin 127K-R-R:                                   | TTGTTCAATTTCTTTATGAAG                       |                 |
| Geminin-DEL-SBC-F                                   | GATGCAAAGCCATGTATATGA                       |                 |
| Geminin-DEL-SBC-R                                   | AGTTCCTTCAGCACACGTGCC                       |                 |
| SPOP sgRNA-F1                                       | CACCGCAAGCTTACCCTCTTCTGCG                   |                 |
| SPOP sgRNA-R1                                       | AAACCGCAGAAGAGGGTAAGCTTGC                   |                 |
| SPOP sgRNA-F3                                       | CACCGGTCATCAGGGAGAAGCCCGT                   |                 |
| SPOP sgRNA-R3                                       | AAACACGGGCTTCTCCCTGATGACC                   |                 |
| pTsin-Myc-SPOP-F                                    | CGC GGATCC ATG GCA TCA ATG CAG AAG CTG A    |                 |
| pTsin-Myc-SPOP-R                                    | CCG CTCGAGTTA GGA TTG CTT CAG GCG TTT GCG T |                 |
| Tsin-GMNN-ASCI-f                                    | AGGCGCGCCT ATGAATCCCAGTATGAAGCA             |                 |
| Tsin-GMNN--XHOI-r                                   | CCG CTCGAG TTA TATACATGGCTTTGCATCCG         |                 |
| Geminin 202S-F-F:                                   | TTTACGGATGCAAAGCCATG                        |                 |
| Geminin 202S-F-R:                                   | GGAAGATACAGTTCCTTCAG                        |                 |
| <b>Deposited Data</b>                               |                                             |                 |
| The whole-genome sequencing data                    | (Ren et al., 2017) <sup>1</sup>             | EGAS00001000888 |

**Supplementary Table 4 continued**

|                                                                                          |                                                   |                                                                                                               |
|------------------------------------------------------------------------------------------|---------------------------------------------------|---------------------------------------------------------------------------------------------------------------|
| The Cancer Genome Atlas (TCGA) prostate cancer dataset                                   | (Cancer Genome Atlas Research, 2015) <sup>2</sup> | Cancer Genome Atlas Research Network                                                                          |
| Gene Set: regulation of DNA replication                                                  | Gene Ontology                                     | GO:0006275                                                                                                    |
| Gene Set: regulation of DNA repair                                                       | Gene Ontology                                     | GO:0006282                                                                                                    |
| SPOP yeast two-hybrid screen data                                                        | This paper                                        | N/A                                                                                                           |
| Mass spectrometry-based SPOP interactome                                                 | This paper                                        | N/A                                                                                                           |
| Mass spectrometry-based Geminin ubiquitination                                           | This paper                                        | N/A                                                                                                           |
| Raw data and images                                                                      | This paper and Mendeley Data                      | <a href="https://data.mendeley.com/datasets/8n7xt5rkhc/1">https://data.mendeley.com/datasets/8n7xt5rkhc/1</a> |
| 2WVR                                                                                     | (De Marco et al., 2009) <sup>3</sup>              | Protein Data Bank                                                                                             |
| 6WGG                                                                                     | (Yuan et al., 2020) <sup>4</sup>                  | Protein Data Bank                                                                                             |
| 7KLZ                                                                                     | This paper                                        | Protein Data Bank                                                                                             |
| <b>Experimental Models: Cell Lines</b>                                                   |                                                   |                                                                                                               |
| Human: C4-2                                                                              | Uro Corporation                                   | N/A                                                                                                           |
| Human: PC-3                                                                              | ATCC                                              | CRL-1435                                                                                                      |
| Human: DU145                                                                             | ATCC                                              | HTB-81                                                                                                        |
| Human: HEK293T                                                                           | ATCC                                              | CRL-11268                                                                                                     |
| Human:22Rv1                                                                              | ATCC                                              | CRL-2505                                                                                                      |
| Human: BPH-1                                                                             | Dr. S. W. Hayward                                 | (Hayward et al., 1995) <sup>5</sup>                                                                           |
| <b>Oligonucleotides</b>                                                                  |                                                   |                                                                                                               |
| Refer to Primer List above for primer sequences                                          | IDT                                               | N/A                                                                                                           |
| <b>Recombinant DNA</b>                                                                   |                                                   |                                                                                                               |
| psPAX2                                                                                   | Addgene                                           | Cat# 12260                                                                                                    |
| pMD2.G                                                                                   | Addgene                                           | Cat# 12259                                                                                                    |
| pCMV-HA                                                                                  | Addgene                                           | Cat# 32530                                                                                                    |
| Puro. Cre-EV (Tsin-EV)                                                                   | Addgene                                           | Cat# 17408                                                                                                    |
| pEnter-Flag-Geminin                                                                      | Vigene Biosciences                                | Cat# CH868616                                                                                                 |
| pcDNA3.1-Cdt1                                                                            | Addgene                                           | Cat# 72681                                                                                                    |
| Tsin-HA-SPOP-WT, F102C, F133V, Q165P                                                     | This paper                                        | N/A                                                                                                           |
| pCMV- Myc-SPOP-Y87C, Y87N, F102C, S119N, F125V, K129N, W131C, W131G, F133L, F133V, K134N | This paper                                        | N/A                                                                                                           |
| pCMV-Myc-SPOP-ΔBTB                                                                       | This paper                                        | N/A                                                                                                           |
| pCMV-Myc-SPOP-ΔMATH                                                                      | This paper                                        | N/A                                                                                                           |

## Supplementary Table 4 continued

| Software and Algorithms                  |                                                     |                                                                                                                                                                                                   |
|------------------------------------------|-----------------------------------------------------|---------------------------------------------------------------------------------------------------------------------------------------------------------------------------------------------------|
| ImageJ                                   | NIH                                                 | RRID: SCR_001935<br><a href="https://imagej.nih.gov/ij/">https://imagej.nih.gov/ij/</a>                                                                                                           |
| FlowJo                                   | FlowJo LLC                                          | RRID: SCR_008520<br><a href="https://www.flowjo.com/solutions/flowjo">https://www.flowjo.com/solutions/flowjo</a>                                                                                 |
| GraphPad Prism 8.0                       | GraphPad, Inc.                                      | RRID: SCR_002798<br><a href="http://www.graphpad.com/">http://www.graphpad.com/</a>                                                                                                               |
| ZEN Digital Imaging for Light Microscopy | Carl Zeiss                                          | RRID: SCR_013672<br><a href="http://www.zeiss.com/microscopy/en_us/products/microscopy-zen.html#introduction">http://www.zeiss.com/microscopy/en_us/products/microscopy-zen.html#introduction</a> |
| PHENIX                                   | University College London                           | <a href="https://phenix-online.org/">https://phenix-online.org/</a>                                                                                                                               |
| PyMOL                                    | The PyMOL Molecular Graphics System                 | <a href="https://pymol.org/2/">https://pymol.org/2/</a>                                                                                                                                           |
| NMRView                                  | One Moon Scientific, Inc.                           | <a href="https://www.onemoonscientific.com/">https://www.onemoonscientific.com/</a>                                                                                                               |
| NMRPipe                                  | Institute for Bioscience and Biotechnology Research | <a href="https://www.ibbr.umd.edu/nmrpipe/index.html">https://www.ibbr.umd.edu/nmrpipe/index.html</a>                                                                                             |
| HKL2000                                  | HKL2000 Research Inc.                               | <a href="https://www.hkl-xray.com/">https://www.hkl-xray.com/</a>                                                                                                                                 |
| GROMACS                                  | University of Groningen                             | <a href="https://www.gromacs.org/">https://www.gromacs.org/</a>                                                                                                                                   |
|                                          |                                                     |                                                                                                                                                                                                   |

## Supplementary References

1. Ren S, *et al.* Whole-genome and transcriptome sequencing of prostate cancer identify new genetic alterations driving disease progression. *Eur Urol* **73**, 322-339 (2017).
2. Cancer Genome Atlas Research N. The Molecular Taxonomy of Primary Prostate Cancer. *Cell* **163**, 1011-1025 (2015).
3. De Marco V, *et al.* Quaternary structure of the human Cdt1-Geminin complex regulates DNA replication licensing. *Proc Natl Acad Sci U S A* **106**, 19807-19812 (2009).
4. Yuan Z, *et al.* Structural basis of Mcm2-7 replicative helicase loading by ORC-Cdc6 and Cdt1. *Nat Struct Mol Biol* **24**, 316-324 (2017).
5. Hayward SW, Dahiya R, Cunha GR, Bartek J, Deshpande N, Narayan P. Establishment and characterization of an immortalized but non-transformed human prostate epithelial cell line: BPH-1. *In Vitro Cell Dev Biol Anim* **31**, 14-24 (1995).
